# Supplementary material for: Ratiometric fluorescence imaging of cell surface pH by poly(ethylene glycol)-phospholipid conjugated with fluorescein isothiocyanate
Source: PubMed Central journal article supplement (PMC5727509; doi:10.1038/s41598-017-17459-y), 2017-12-13
Supplement: 41598_2017_17459_MOESM1_ESM.pdf [file 41598_2017_17459_MOESM1_ESM.pdf]

## Supplementary information

### Ratiometric fluorescence imaging of cell surface pH by poly(ethylene glycol)-phospholipid conjugated with fluorescein isothiocyanate

*Ryuichi Ohgaki<sup>†</sup>, Yuji Teramura<sup>‡//</sup>, Daichi Hayashi<sup>†</sup>, Lili Quan<sup>†</sup>, Suguru Okuda<sup>†</sup>, Shushi Nagamori<sup>†</sup>, Madoka Takai<sup>‡</sup> and Yoshikatsu Kanai<sup>\*,†</sup>*

<sup>†</sup> Department of Bio-system Pharmacology, Graduate School of Medicine, Osaka University, 2-2 Yamadaoka, Suita, Osaka 565-0871, Japan.

<sup>‡</sup> Department of Bioengineering, The University of Tokyo, 7-3-1 Hongo, Bunkyo-ku, Tokyo 113-8656, Japan.

<sup>//</sup> Department of Immunology, Genetics and Pathology (IGP), Rudbeck Laboratory C5:3, Uppsala University, SE-751 85 Uppsala, Sweden.

## Supplementary Figure

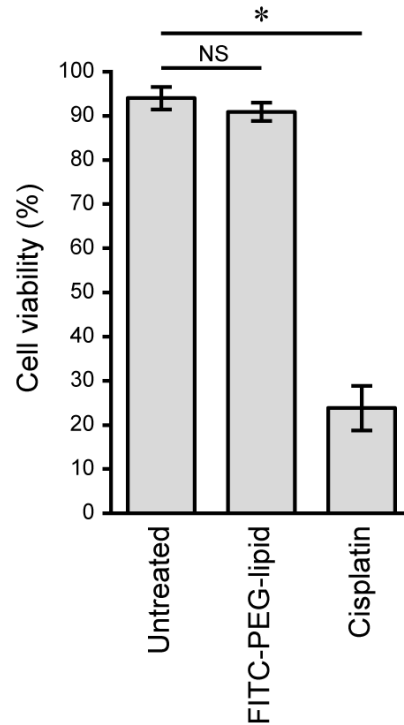

**Supplementary Figure S1. Effect of FITC-PEG-lipid on cell viability.** KATOIII cells incubated with FITC-PEG-lipid and untreated cells were subjected to trypan blue exclusion assay. Viability of cisplatin-treated cells were analyzed as a control. Data shown are mean  $\pm$  SD (n = 4). Statistical analysis was performed by one-way ANOVA followed by Bonferroni post-hoc tests for comparison with untreated cells. \*  $p < 0.05$ . NS, not significant.

## Supplementary Video Legends

**Supplementary Video S1. Time-lapse ratiometric fluorescence analysis of the extracellular pH.** Movie file was constructed from the pseudocolored images shown in Fig. 5 using ImageJ software. Interval: 10 sec. Frame rate: 3 fps.

## Supplementary Methods

*Cell viability analysis by trypan blue exclusion assay*

KATOIII cells were washed twice and incubated in HBSS (pH 7.0) with or without FITC-PEG-lipid (0.1 mg/mL) at room temperature for 30 min. After washing twice in HBSS (pH 7.0), cell were seeded in 12-well plate at the density of  $4 \times 10^4$  cells/well and cultured for 72 hours. Cells were collected and mixed with 0.4% trypan blue solution at 1:1 volume ratio. The viability was calculated as the percentage of trypan blue-negative cells. As a control of cytotoxic compound, cisplatin was added to the medium at 20  $\mu\text{g/mL}$ .
